# Supplementary material
Source: MDPI journal article supplement (https://www.mdpi.com/2071-1050/15/2/1081)
Supplement: s1 [file s1]

**Table S1.** Data sources. KSU performance test  
(<https://www.agronomy.k-state.edu/outreach-and-services/crop-performance-tests/soybeans/>, accessed 2022/03); Ciampitti et al., 2017 (<https://doi.org/10.4148/2378-5977.7434>); Ciampitti, et al., 2020 (figshare: 10.6084/m9.figshare.20018015).

| Site       | Lon    | Lat   | Year                    | Planting dates      | Maturity group    | Plant density (pl/m <sup>2</sup> ) | Harvest dates              | Source                             |
|------------|--------|-------|-------------------------|---------------------|-------------------|------------------------------------|----------------------------|------------------------------------|
| Assaria    | -97.60 | 38.68 | 2014 - 2021             | May 15 to June 14   | IV and V          | 34 and 38                          | October 16 to November 1   | K-State soybean performance trials |
| Belleville | -97.84 | 39.83 | 2014 - 2020             | May 15 to June 17   | III, IV and V     | 34 and 35                          | October 15 to October 27   | K-State soybean performance trials |
| Columbus   | -94.84 | 37.16 | 2016; 2017; 2019        | June 27 to June 29  | IV, V and VI      | 25 and 30                          | November 16 to November 21 | K-State soybean performance trials |
| Erie       | -95.24 | 37.56 | 2014; 2016 - 2021       | May 19 to July 11   | IV and V          | 25, 30 and 39                      | November 11 to December 10 | K-State soybean performance trials |
| Kiro       | -95.79 | 39.09 | 2017 - 2021             | April 06 to June 10 | III, IV and V     | 25 and 35                          | October 12 to October 22   | K-State soybean performance trials |
| McCune     | -95.01 | 37.35 | 2014 - 2016; 2018; 2019 | June 06 to July 01  | III, IV, V and VI | 25, 35, 38                         | November 02 to November 29 | K-State soybean performance trials |
| Onaga      | -96.16 | 39.48 | 2014 - 2018             | May 06 to June 22   | IV                | 34 and 38                          | October 08 to November 19  | K-State soybean performance trials |
|            |        |       | 2014 - 2021             | May 16 to July 6    | III, IV and V     | 34 and 35                          | October 14 to October 22   | K-State soybean performance trials |
| Ottawa     | -95.24 | 38.53 | 2014 - 2016             | May 04 to July 15   | IV and V          | 32                                 | Not available              | Ciampitti et al., (2017)           |
|            |        |       | 2018 - 2019             | May 10 to June 29   | III and IV        | 32                                 | October 18 to October 25   | field research studies             |
|            |        |       | 2014; 2015; 2018; 2020  | June 06 to July 07  | IV, V and VI      | 25 and 30                          | November 5 to November 25  | K-State soybean performance trials |
| Parsons    | -95.17 | 37.22 | 2014 - 2015             | May 02 to July 01   | IV and V          | 32                                 | Not available              | Ciampitti et al., (2017)           |

|           |        |       |                          |                     |               |           |                            |                                    |
|-----------|--------|-------|--------------------------|---------------------|---------------|-----------|----------------------------|------------------------------------|
| Pittsburg | -94.70 | 37.41 | 2014 - 2018; 2020 - 2021 | June 10 to July 08  | IV and V      | 30 and 38 | November 03 to November 16 | K-State soybean performance trials |
| Riley     | -96.83 | 39.29 | 2019 - 2021              | May 13 to June 04   | IV            | 37 and 38 | October 22 to October 24   | K-State soybean performance trials |
| Rossville | -95.95 | 39.13 | 2016                     | May 30 to June 02   | IV            | 25        | October 19                 | K-State soybean performance trials |
|           |        |       | 2014 - 2017; 2021        | May 07 to June 02   | IV            | 34        | October 14 to October 16   | K-State soybean performance trials |
| Topeka    | -95.67 | 39.04 | 2014-2016                | April 30 to June 09 | III, V and VI | 32        | Not available              | Ciampitti et al., (2017)           |
|           |        |       | 2018 - 2019              | May 10 to June 29   | III and IV    | 32        | October 08 to October 17   | Ciampitti, et al., (2020)          |

**Figure S1.** Distribution of planting dates in the 13 sites of the dataset from 2014 to 2021.

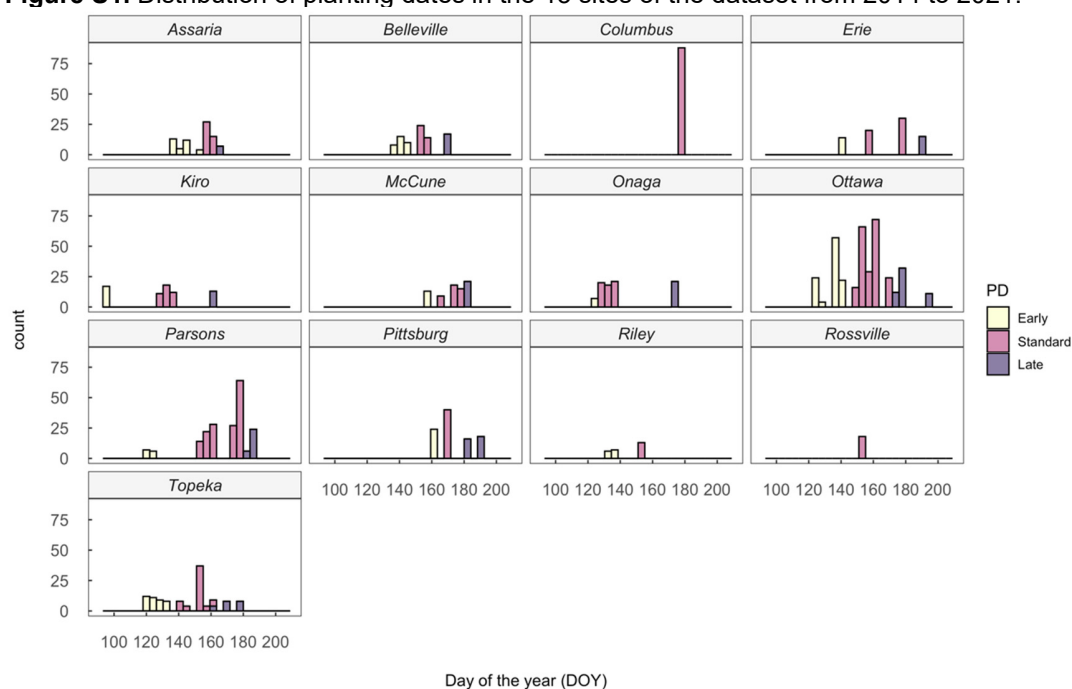

**Table S2.** Standard planting date, soil characteristics, and weather variables used to create the clusters

| Site       | Standard<br>planting<br>date (DOY) | Weather characteristics     |                |     |     | Soil characteristics |          |          |
|------------|------------------------------------|-----------------------------|----------------|-----|-----|----------------------|----------|----------|
|            |                                    | Cumulative<br>rainfall (mm) | Temp. max (°C) |     |     | Sand<br>(%)          | Silt (%) | Clay (%) |
|            |                                    |                             | Jul            | Aug | Sep |                      |          |          |
| Assaria    | 155 – 163                          | 595                         | 34             | 33  | 30  | 11                   | 67       | 22       |
| Belleville | 150 – 160                          | 601                         | 33             | 31  | 29  | 10                   | 59       | 31       |
| Riley      | 150 – 160                          | 691                         | 32             | 31  | 29  | 4                    | 61       | 35       |
| Kiro       | 120 – 150                          | 734                         | 32             | 31  | 29  | 6                    | 70       | 24       |
| Onaga      | 127 – 140                          | 713                         | 32             | 31  | 29  | 10                   | 65       | 25       |
| Rossville  | 150 – 153                          | 735                         | 32             | 31  | 29  | 15                   | 66       | 19       |
| Topeka     | 120 – 160                          | 717                         | 32             | 31  | 29  | 7                    | 60       | 33       |
| Columbus   | 178 – 180                          | 809                         | 32             | 32  | 30  | 42                   | 37       | 21       |
| Erie       | 150 – 180                          | 836                         | 33             | 32  | 30  | 13                   | 67       | 20       |
| McCune     | 165 – 180                          | 836                         | 33             | 32  | 30  | 4                    | 54       | 42       |
| Ottawa     | 145 – 170                          | 768                         | 32             | 32  | 29  | 7                    | 70       | 23       |
| Parsons    | 150 – 180                          | 819                         | 32             | 32  | 30  | 13                   | 67       | 20       |
| Pittsburg  | 165 – 175                          | 868                         | 33             | 32  | 30  | 13                   | 67       | 20       |

**Figure S2.** Interval where setting pods occurs in the state of Kansas according to NASS-USDA (<https://quickstats.nass.usda.gov/results/20E59F49-96CD-3192-AEF5-6B5B63E28C43>, visited April 2022)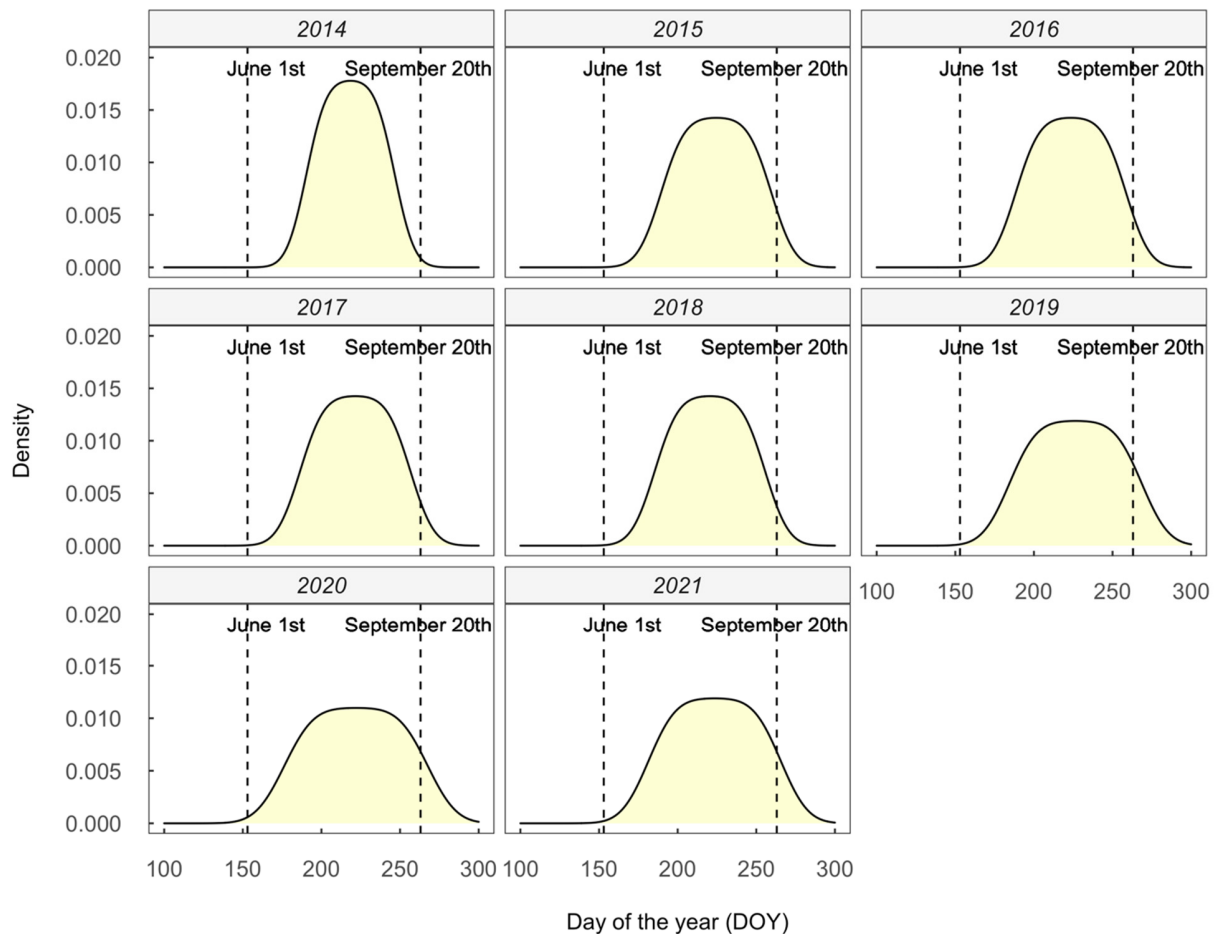

**TABLE S3:** Parameters included in the generic genotypes used from APSIM Next generation.

| Parameter                                                      | Generic_MG     |                |                 |                |
|----------------------------------------------------------------|----------------|----------------|-----------------|----------------|
|                                                                | MG3            | MG4            | MG5             | MG6            |
| Vegetative.Target.FixedValue (°Cd)                             | 380            | 388            | 396             | 404            |
| EarlyFlowering.Target.FixedValue (°Cd)                         | 120            | 140            | 160             | 180            |
| EarlyGrainFilling.Target.FractionofGrainfillPeriod.FixedValue  | 0.361          | 0.324          | 0.072           | 0.056          |
| LateGrainFilling.Target.EntireGrainfillPeriod.FixedValue (°Cd) | 664            | 664            | 696             | 712            |
| VegetativePhotoperiodModifier.XYPairs.X                        | 13.4,<br>16.91 | 13.1,<br>16.49 | 12.83,<br>16.13 | 12.58,<br>15.8 |
| ReproductivePhotoperiodModifier.XYPairs.X                      | 13.4,<br>16.91 | 13.1,<br>16.49 | 12.83,<br>16.13 | 12.58,<br>15.8 |

**Figure S3.** Comparison of days of the year where anthesis occurs between the simulated data and data obtained from the National Agricultural Statistics Service (<https://quickstats.nass.usda.gov/results/21B7C2DA-A180-3470-A7F4-383E92588748>, visited April 2022).

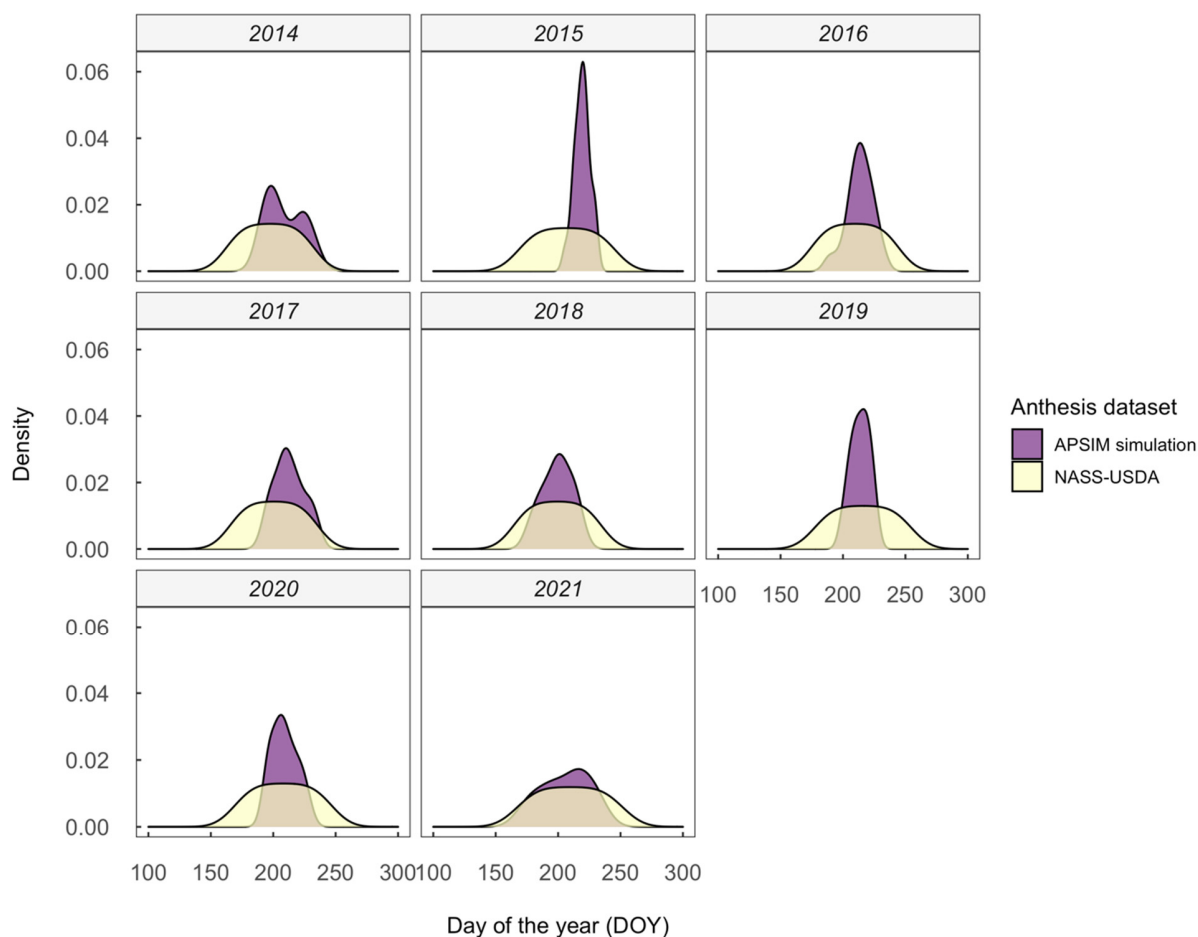



**TABLE S4:** Soybean seed yield (kg ha<sup>-1</sup>) for the different planting dates x maturity groups combination in the South-east cluster. Values within different letters are significantly different at P<0.05.

| Cluster    | Planting date | Maturity group | Mean yield (kg ha <sup>-1</sup> ) |
|------------|---------------|----------------|-----------------------------------|
| South-east | 15-Apr        | VI             | 4958 a                            |
|            | 15-Apr        | V              | 4931 ab                           |
|            | 1-May         | VI             | 4821 abc                          |
|            | 1-May         | V              | 4818 abc                          |
|            | 15-Apr        | IV             | 4808 abc                          |
|            | 1-May         | IV             | 4750 abcd                         |
|            | 15-May        | V              | 4742 abcd                         |
|            | 15-May        | IV             | 4701 abcd                         |
|            | 15-May        | VI             | 4624 bcde                         |
|            | 1-Jun         | V              | 4530 cdef                         |
|            | 1-Jun         | V              | 4519 cdef                         |
|            | 15-Apr        | III            | 4429 defg                         |
|            | 15-Jun        | IV             | 4319 efgh                         |
|            | 1-Jun         | VI             | 4318 efgh                         |
|            | 1-May         | III            | 4311 efgh                         |
|            | 15-May        | III            | 4256 fghi                         |
|            | 15-Jun        | V              | 4173 ghij                         |
|            | 1-Jun         | III            | 4078 hijk                         |
|            | 15-Jun        | VI             | 3949 ijk                          |
|            | 1-Jul         | IV             | 3891 jkl                          |
|            | 15-Jun        | III            | 3832 klm                          |
|            | 1-Jul         | V              | 3618 lmn                          |
|            | 1-Jul         | III            | 3527 mn                           |
|            | 1-Jul         | VI             | 3520 mn                           |
|            | 15-Jul        | IV             | 3357 no                           |
|            | 15-Jul        | III            | 3145 op                           |
|            | 15-Jul        | VI             | 3025 pq                           |
|            | 15-Jul        | VI             | 2803 q                            |

**Table S5:** ANOVA (Type III Wald chi square tests) of the current weather (2012 – 2021) for the three clusters within Kansas.

| Cluster       | Component                      | P-value      |
|---------------|--------------------------------|--------------|
| North-central | Planting date                  | <2.2e-16 *** |
|               | Maturity group                 | 6.54e-10 *** |
|               | Planting date : Maturity group | 0.9991       |
| North-east    | Planting date                  | <2.2e-16 *** |
|               | Maturity group                 | 2.15e-09 *** |
|               | Planting date : Maturity group | 0.9989       |
| South-east    | Planting date                  | <2.2e-16 *** |
|               | Maturity group                 | 3.39e-10 *** |
|               | Planting date : Maturity group | 0.0284 *     |

Signif. codes: 0 '\*\*\*' 0.001 '\*\*' 0.01 '\*' 0.05 '.' 0.1 ' ' 1

**Figure S4:** Simulated seed yield ( $\text{kg ha}^{-1}$ ) across the 30 years of study within the three clusters in Kansas (North-central, North-east, and South-east).

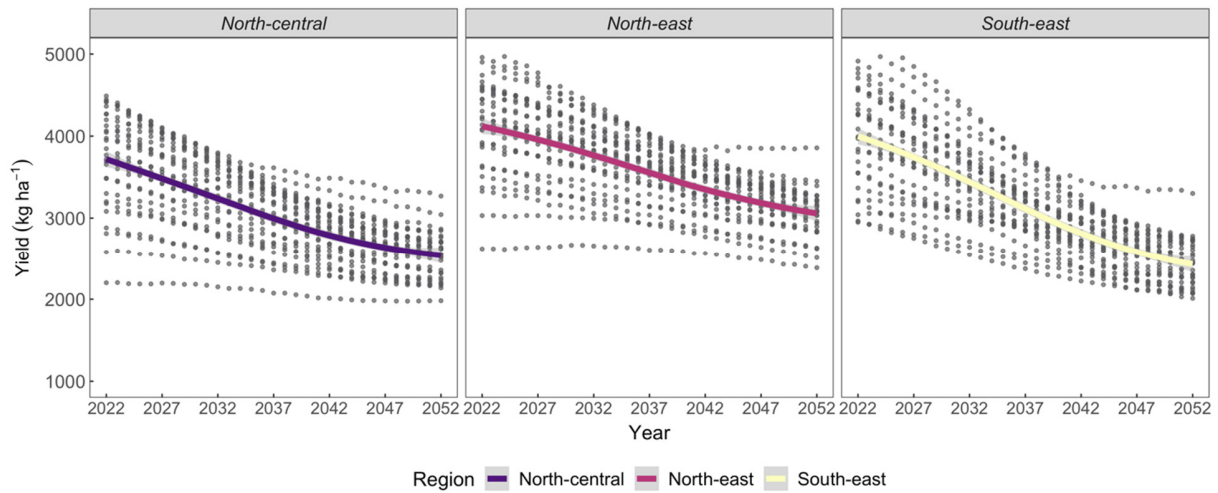

**Table S6:** Climate change in the future (2043 – 2052) compared to the current weather (2012 – 2021) in the three clusters in Kansas.

| Cluster       | Weather variable         | Winter | Spring | Summer | Fall | Year |
|---------------|--------------------------|--------|--------|--------|------|------|
| North-central | Maximum temperature (°C) | -0.33  | -0.63  | 1.34   | 1.03 | -148 |
|               | Minimum temperature (°C) | 0.04   | -0.17  | 1.72   | 1.63 |      |
|               | Cumulative rainfall (mm) | 34     | 65     | -171   | -77  |      |
| North-east    | Maximum temperature (°C) | -0.22  | -0.27  | 1.38   | 1.65 | -73  |
|               | Minimum temperature (°C) | 0.19   | -0.22  | 1.39   | 1.81 |      |
|               | Cumulative rainfall (mm) | 30     | 121    | -162   | -61  |      |
| South-east    | Maximum temperature (°C) | 0.16   | 0.19   | 1.70   | 1.65 | -308 |
|               | Minimum temperature (°C) | 0.46   | 0.15   | 1.55   | 1.81 |      |
|               | Cumulative rainfall (mm) | -21    | 24     | -223   | -87  |      |



**Table S7:** Soybean seed yield (kg ha<sup>-1</sup>) for the different planting dates x maturity groups combination within the three clusters in Kansas. Values within different letters are significantly different at P<0.05.

| Cluster                    | Planting date | Maturity group | Mean yield (kg ha <sup>-1</sup> ) |
|----------------------------|---------------|----------------|-----------------------------------|
| North-central<br>p-value = | 15-Apr        | III            | 3380 a                            |
|                            | 1-May         | III            | 3185 b                            |
|                            | 15-Apr        | IV             | 3008 c                            |
|                            | 15-May        | III            | 2954 cd                           |
|                            | 1-May         | IV             | 2947 cd                           |
|                            | 15-Jun        | IV             | 2919 cd                           |
|                            | 1-Jun         | IV             | 2838 de                           |
|                            | 15-May        | IV             | 2836 de                           |
|                            | 1-Jun         | III            | 2832 de                           |
|                            | 1-May         | V              | 2799 de                           |
|                            | 1-Jul         | IV             | 2795 de                           |
|                            | 15-May        | V              | 2721 ef                           |
|                            | 15-Jun        | V              | 2710 ef                           |
|                            | 15-Jun        | III            | 2699 efg                          |
|                            | 1-Jun         | V              | 2697 efg                          |
|                            | 15-Apr        | V              | 2693 efg                          |
|                            | 1-Jul         | V              | 2575 fgh                          |
|                            | 15-Jul        | IV             | 2534 gh                           |
|                            | 15-Apr        | VI             | 2469 hi                           |
|                            | 1-May         | VI             | 2468 hi                           |
|                            | 1-Jul         | III            | 2436 hi                           |
|                            | 15-May        | VI             | 2336 ij                           |
|                            | 15-Jul        | III            | 2305 ij                           |
|                            | 15-Jun        | VI             | 2260 j                            |
|                            | 15-Jul        | V              | 2256 j                            |
|                            | 1-Jun         | VI             | 2250 j                            |
|                            | 1-Jul         | VI             | 2210 j                            |
|                            | 15-Jul        | VI             | 1986 k                            |
| North-east                 | 15-Apr        | III            | 3851 a                            |
|                            | 15-Apr        | IV             | 3536 b                            |
|                            | 15-Apr        | VI             | 3504 bc                           |
|                            | 15-Apr        | V              | 3461 bcd                          |
|                            | 1-May         | III            | 3448 bcd                          |
|                            | 1-Jun         | V              | 3430 cd                           |
|                            | 15-Jun        | V              | 3396 de                           |
|                            | 1-May         | VI             | 3379 de                           |
|                            | 15-May        | V              | 3373 de                           |

|            |        |     |          |
|------------|--------|-----|----------|
|            | 15-Jun | IV  | 3370 de  |
|            | 1-Jun  | IV  | 3332 ef  |
|            | 1-May  | V   | 3310 efg |
|            | 15-May | VI  | 3256 fgh |
|            | 1-Jul  | IV  | 3217ghi  |
|            | 1-May  | IV  | 3194 hi  |
|            | 15-May | IV  | 3188 hi  |
|            | 1-Jul  | V   | 3177 hi  |
|            | 15-May | III | 3172 hij |
|            | 1-Jun  | VI  | 3140 ijk |
|            | 1-Jun  | III | 3080 jk  |
|            | 15-Jun | VI  | 3068 kl  |
|            | 15-Jul | IV  | 2981 lm  |
|            | 15-Jun | III | 2954 m   |
|            | 1-Jul  | VI  | 2932 m   |
|            | 1-Jul  | III | 2754 n   |
|            | 15-Jul | V   | 2737 n   |
|            | 15-Jul | III | 2641 o   |
|            | 15-Jul | VI  | 2478 p   |
| South-east | 15-Apr | III | 3369 a   |
|            | 15-Jun | VI  | 2947 b   |
|            | 1-Jul  | VI  | 2917 b   |
|            | 1-Jun  | VI  | 2909 bc  |
|            | 1-Jul  | V   | 2847 cd  |
|            | 15-Jun | V   | 2834 d   |
|            | 1-May  | III | 2809 de  |
|            | 15-May | VI  | 2807 de  |
|            | 1-May  | VI  | 2762 ef  |
|            | 15-Apr | IV  | 2748 efg |
|            | 15-Jul | VI  | 2725 fg  |
|            | 1-Jun  | V   | 2691 gh  |
|            | 15-Jul | V   | 2657 hi  |
|            | 15-Apr | VI  | 2650 hi  |
|            | 15-Jun | IV  | 2617 i   |
|            | 15-Jul | IV  | 2552 j   |
|            | 1-Jul  | IV  | 2537 j   |
|            | 1-Jun  | IV  | 2459 k   |
|            | 15-May | III | 2399 kl  |
|            | 15-May | V   | 2390 l   |
|            | 1-May  | IV  | 2375 lm  |

|        |     |         |
|--------|-----|---------|
| 15-Jun | III | 2313 mn |
| 15-Apr | V   | 2304 n  |
| 1-May  | V   | 2278 no |
| 1-Jun  | III | 2255 no |
| 15-Jul | III | 2219 op |
| 15-May | IV  | 2163 pq |
| 1-Jul  | III | 2139 q  |

---
